# Supplementary material for: Glutamatergic Receptors Modulate Normoxic but Not Hypoxic Ventilation and Metabolism in Naked Mole Rats
Source: Front Physiol. 2019 Feb 18;10:106. doi: 10.3389/fphys.2019.00106 (PMC6387965; doi:10.3389/fphys.2019.00106)
Supplement: TABLE S1 — Linear mixed effects models for all dependent variables presented in the main body of the text used to test for effects of acclimation group [control or chronic sustained hypoxia (CSH)], drug treatment [sham or drug (CNQX and MK-801)], and level of inspired O2 (21% O2 or 7% O2). Statistical significance is set as p < 0.05 and indicated by the dark gray boxes. [file Table_1.XLSX]

## Sheet: S.Table
model: lmer(x ~ acclimatization group*injection*exposure + body mass + (1|individual)
CNQX	vo2	vco2	logrer	ve	fb	vt	acro2	acrco2	o2d	o2e
acclimatization group (CSN vs. CSH)	F1,55=0.54 p=0.47	F1,54=0.95 p=0.34	F1,55=0.17 p=0.68	F1,56= 2.19 p=0.15	F1,55= 6.38 p<0.05	F1,55= 9.98 p<0.01	F1,51= 0.71 p=0.40	F1,51= 0.82 p=0.37	F1,53= 1.92 p=0.17	F1,55= 0.81 p=0.37
injection (sham vs. CNQX)	F1,55= 0.11 p=0.74	F1,54= 0.02 p=0.90	F1,55= 0.78 p=0.38	F1,56= 1.82 p=0.18	F1,56= 0.44 p=0.51	F1,56= 0.89 p=0.35	F1,51= 0.65 p=0.42	F1,51= 1.92 p=0.17	F1,53= 2.87 p=0.09	F1,55= 0.58 p=0.45
exposure (pre-injection 21% O2, post-injection O2, post-injection 7% O2 )	F2,104=132.85 p<0.00001	F2,105 =102.07p<0.00001	F2,107 =10.47 p<0.0001	F2,102 = 10.18 p<0.0001	F2,106 = 40.43 p<0.00001	F2,105 = 75.14 p<0.00001	F2,100 = 126.67 p<0.00001	F2,100= 125.90 p<0.00001	F2,102 = 54.47 p<0.00001	F2,103 = 2.05 p=0.13
body mass	F1,56=7.22 p<0.01	F1,56= 5.56 p<0.05	F1,59= 0.42 p=0.52	F1,56= 0.82 p=0.37	F1,56= 0.64 p=0.43	F1,55= 0.37 p=0.55	F1,53= 1.58 p=0.21	F1,52= 1.14 p=0.29	F1,55= 1.36 p=0.25	F1,56= 0.26 p=0.61
acclimatization group * injection	F1,55= 0.29 p=0.59	F1,55= 0.86 p=0.36	F1,56=19.20 p<0.0001	F1,56= 4.14 p<0.05	F1,55= 0.53 p=0.47	F1,55= 2.51 p=0.12	F1,51= 3.40 p=0.07	F1,51= 0.43 p=0.52	F1,54= 3.36 p=0.07	F1,55= 5.76 p<0.05
acclimatization group * exposure	F2,105= 1.15 p=0.32	F2,105= 1.35 p=0.26	F2,107= 0.03 p=0.97	F2,102= 1.00 p=0.37	F2,106= 0.27 p=0.77	F2,105= 1.51 p=0.23	F2,100= 0.96 p=0.39	F2,99= 1.10 p=0.34	F2,102= 1.90 p=0.15	F2,103= 0.26 p=0.77
injection * exposure	F2,105= 1.74 p=0.18	F2,105= 2.80 p=0.07	F2,107= 0.82 p=0.44	F2,102= 8.11 p<0.001	F2,106= 8.11 p<0.001	F2,105= 2.18 p=0.12	F2,100= 0.50 p=0.61	F2,99= 0.75 p=0.47	F2,102= 8.63 p<0.001	F2,103= 3.63 p<0.05
acclimatization group * injection * exposure	F2,105= 4.21 p<0.05	F2,105= 0.67 p=0.52	F2,107= 0.93 p=0.40	F2,102= 1.26 p=0.29	F2,106= 0.47 p=0.63	F2,105= 1.07 p=0.35	F2,100= 0.59 p=0.56	F2,99= 0.24 p=0.79	F2,102= 0.46 p=0.63	F2,103= 1.37 p=0.26
MK-801	vo2	vco2	rer	ve	fb	vt	acro2	acrco2	o2d	o2e
acclimatization group (CSN vs. CSH)	F1,48= 0.06 p=0.81	F1,48= 1.72 p=0.20	F1,47= 19.64 p<0.0001	F1,46= 13.05 p<0.001	F1,45= 00001 p=0.99	F1,48= 23.58 p<0.0001	F1,45= 17.85 p<0.001	F1,46= 6.15 p<0.05	F1,44= 11.13 p<0.01	F1,47= 14.13 p<0.001
injection (sham vs. MK-801)	F1,47= 1.29 p=0.26	F1,48= 0.29 p=0.59	F1,46= 4.88 p<0.05	F1,46= 2.91 p=0.09	F1,44= 0.14 p=0.71	F1,47= 2.55 p=0.12	F1,44= 0.15 p=0.70	F1,46= 1.31 p=0.26	F1,43= 2.43 p=0.13	F1,46= 0.32 p=0.58
exposure (pre-injection 21% O2, post-injection O2, post-injection 7% O2 )	F2,92 = 129.27 p<0.00001	F2,92 = 87.42 p<0.00001	F2,92= 31.52 p<0.00001	F2,89 = 5.56 p<0.01	F2,87 = 22.74 p<0.00001	F2,90 = 78.65 p<0.00001	F2,87= 203.13 p<0.00001	F2,89 = 139.81 p<0.00001	F2,86= 39.31 p<0.00001	F2,89 = 4.26 p<0.05
body mass	F1,51= 9.37 p<0.005	F1,51= 7.35 p<0.05	F1,51= 2.08 p=0.16	F1,48= 12.84 p<0.001	F1,46= 3.41 p=0.07	F1,49= 9.98 p<0.01	F1,46= 0.14 p=0.71	F1,48= 1.11 p=0.30	F1,46= 14.53 p<0.001	F1,49= 1.94 p=0.17
acclimatization group * injection	F1,48= 0.53 p=0.47	F1,48= 027 p=0.61	F1,47= 0.74 p=0.40	F1,46= 0.62 p=0.43	F1,45= 0.66 p=0.42	F1,48= 2.34 p=0.13	F1,44= 0.03 p=0.88	F1,46= 0.43 p=0.52	F1,44= 0.96 p=0.33	F1,46= 0.58 p=0.45
acclimatization group * exposure	F2,92= 2.52 p=0.09	F2,92= 0.18 p=0.84	F2,92= 0.19 p=0.83	F2,89= 2.32 p=0.11	F2,87= 1.41 p=0.25	F2,90= 2.84 p=0.06	F2,87= 6.06 p<0.005	F2,89= 2.42 p=0.01	F2,86= 0.27 p=0.77	F2,89= 0.16 p=0.85
injection * exposure	F2,92= 3.60 p<0.05	F2,92= 2.92 p=0.06	F2,92= 1.54 p=0.22	F2,89= 1.75 p=0.18	F2,87= 1.58 p=0.21	F2,90= 0.27 p=0.76	F2,87= 0.50 p=0.61	F2,89= 0.31 p=0.74	F2,86= 3.21 p<0.05	F2,89= 0.22 p=0.80
acclimatization group * injection * exposure	F2,92= 0.90 p=0.41	F2,92= 0.31 p=0.74	F2,92= 0.19 p=0.83	F2,89= 0.87 p=0.42	F2,87= 0.19 p=0.82	F2,90= 0.26 p=0.77	F2,87= 0.55 p=0.58	F2,89= 0.12 p=0.89	F2,86= 0.49 p=0.61	F2,89= 0.21 p=0.81
